# Supplementary material
Source: ML conference proceedings conference paper supplement (https://openaccess.thecvf.com/content/ICCV_2019/html/Usman_PuppetGAN_Cross-Domain_Image_ICCV_2019_paper.html)
Supplement: Supplementary file 2 [file Usman_PuppetGAN_Cross-Domain_Image_ICCV_2019_supplemental.zip]

Archive with 2 entries (2 files):
- 0502-supp.pdf
- face_results_demo_x264.mp4
